# Supplementary material for: Conformationally dynamic copper coordination complexes
Source: Royal Society of Chemistry journal article supplement (doi:10.1039/d2dt00312k), 2022-01-01
Supplement: d2dt00312k1.pdf [file d2dt00312k1.pdf]

Electronic Supporting Information for  
**Conformationally Dynamic Copper Coordination Complexes**

Bronte J. Charette, Paul J. Griffin, Claire M. Zimmerman and Lisa Olshansky\*

*Department of Chemistry, University of Illinois at Urbana-Champaign, Urbana, Illinois, 618081, United States*

**Table of Contents**

|                                                                                                                                                                                |     |
|--------------------------------------------------------------------------------------------------------------------------------------------------------------------------------|-----|
| <b>VT-NMR lineshape analysis</b> .....                                                                                                                                         | S1  |
| <b>Table S1.</b> EPR simulation parameters for $[\text{CuCl}(\text{dpa}^{\text{OMe}})][\text{PF}_6]$ .....                                                                     | S2  |
| <b>Table S2.</b> EPR simulation parameters for $\text{CuCl}_2(\text{dpa}^{\text{H}})$ .....                                                                                    | S2  |
| <b>Table S3.</b> Peak integrations obtained from DPVs for $\text{CuCl}(\text{dpa}^{\text{OMe}})$ and $\text{CuCl}(\text{dpa}^{\text{H}})$ .....                                | S2  |
| <b>Table S4.</b> CV simulations parameters for $\text{CuCl}(\text{dpa}^{\text{OMe}})$ and $[\text{CuCl}(\text{dpa}^{\text{OMe}})][\text{PF}_6]$ .....                          | S3  |
| <b>Table S5.</b> CV simulation parameters for $\text{CuCl}(\text{dpa}^{\text{H}})$ and $\text{CuCl}_2(\text{dpa}^{\text{H}})$ .....                                            | S3  |
| <b>Table S6.</b> XRD parameters for $[\{\text{Cu}(\text{dpa}^{\text{OMe}})\}_2(\mu\text{-Cl})][\text{CuCl}_2]$ and $[\text{CuCl}(\text{dpa}^{\text{OMe}})][\text{PF}_6]$ ..... | S4  |
| <b>Figure S1.</b> Mass spectrum of $\text{CuCl}(\text{dpa}^{\text{OMe}})$ .....                                                                                                | S5  |
| <b>Figure S2.</b> Mass spectrum of $\text{CuCl}(\text{dpa}^{\text{H}})$ .....                                                                                                  | S6  |
| <b>Figure S3.</b> Overlaid $^1\text{H}$ -NMR spectrum of $\text{CuCl}(\text{dpa}^{\text{OMe}})$ and $\text{dpa}^{\text{OMe}}$ ligand in $d_6$ -DMSO.....                       | S7  |
| <b>Figure S4.</b> Overlaid $^1\text{H}$ -NMR spectrum of $\text{CuCl}(\text{dpa}^{\text{H}})$ and $\text{dpa}^{\text{H}}$ ligand in $d_6$ -DMSO.....                           | S8  |
| <b>Figure S5.</b> CV of ligand $\text{dpa}^{\text{OMe}}$ .....                                                                                                                 | S9  |
| <b>Figure S6.</b> CV scan rate dependencies of $\text{CuCl}(\text{dpa}^{\text{OMe}})$ and $[\text{CuCl}(\text{dpa}^{\text{OMe}})][\text{PF}_6]$ .....                          | S10 |
| <b>Figure S7.</b> DPV of $\text{CuCl}(\text{dpa}^{\text{OMe}})$ and $\text{CuCl}(\text{dpa}^{\text{H}})$ at various concentrations.....                                        | S11 |
| <b>Figure S8.</b> CV simulations.....                                                                                                                                          | S12 |
| <b>Figure S9.</b> CV scan rate dependencies of $\text{CuCl}(\text{dpa}^{\text{H}})$ and $\text{CuCl}_2(\text{dpa}^{\text{H}})$ .....                                           | S13 |
| <b>Figure S10.</b> $^1\text{H}$ -NMR spectrum of $\text{CuCl}(\text{dpa}^{\text{OMe}})$ in $d_6$ -DMSO.....                                                                    | S14 |
| <b>Figure S11.</b> $^{13}\text{C}$ -NMR spectrum of $\text{CuCl}(\text{dpa}^{\text{OMe}})$ in $d_6$ -DMSO.....                                                                 | S15 |
| <b>Figure S12.</b> $^1\text{H}$ -NMR spectrum of $\text{CuCl}(\text{dpa}^{\text{H}})$ in $d_6$ -DMSO.....                                                                      | S16 |
| <b>Figure S13.</b> $^{13}\text{C}$ -NMR spectrum of $\text{CuCl}(\text{dpa}^{\text{H}})$ in $d_6$ -DMSO.....                                                                   | S17 |
| <b>Figure S14.</b> VT-NMR spectra of $\text{CuCl}(\text{dpa}^{\text{OMe}})$ in $d_2$ -DCM.....                                                                                 | S18 |
| <b>Figure S15.</b> Eyring plot for the dynamic NMR process of $\text{CuCl}(\text{dpa}^{\text{OMe}})$ .....                                                                     | S19 |
| <b>Figure S16.</b> VT-NMR spectra of $\text{CuCl}(\text{dpa}^{\text{H}})$ in $d_2$ -DCM.....                                                                                   | S20 |
| <b>Figure S17.</b> Eyring plot for the dynamic NMR process of $\text{CuCl}(\text{dpa}^{\text{H}})$ .....                                                                       | S21 |
| <b>Figure S18.</b> UV-visible absorption spectra.....                                                                                                                          | S22 |
| <b>References</b> .....                                                                                                                                                        | S23 |

**VT-NMR lineshape analysis** was performed using equations derived from Bloch equations modified to include a pseudo-first order decay term.<sup>1,2</sup> Each signal was fit to a Lorentzian shape in MestReNova Software.<sup>3</sup> Using an estimation of the transverse relaxation ( $T_2^{eff}$ ) in the absence of exchange from the full width at half max (fwhm) of a non-exchanging proton signal (equation 1), the pseudo-first order rate constant ( $k$ ) can be calculated from the fwhm for the subsequent signal (Eq 2).

$$T_2^{eff} = \frac{1}{\pi [fwhm]} \quad (1)$$

$$k = \pi [fwhm - \frac{1}{\pi T_2^{eff}}] \quad (2)$$

Following determination of  $k$ , a plot of  $\ln(k/T)$  versus  $1/T$  was used to extract activation parameters using the following equations:

$$\ln\left(\frac{k}{T}\right) = \frac{\Delta H^\ddagger}{R} * \frac{1}{T} + \ln\left(\frac{k_b}{h}\right) + \frac{\Delta S^\ddagger}{R} \quad (3)$$

Where:

$$Slope = \frac{\Delta H^\ddagger}{R} \quad (4)$$

$$Intercept = \ln\left(\frac{k_b}{h}\right) + \frac{\Delta S^\ddagger}{R} \quad (5)$$

**Constants used:**

$$k_b = 1.38 \times 10^{-23} \text{ J-K}^{-1}$$

$$h = 6.63 \times 10^{-34} \text{ J-s}$$

$$R = 1.98 \text{ cal K}^{-1}\text{-mol}^{-1}$$

**Table S1. EPR simulation parameters for [CuCl(dpa<sup>OMe</sup>)]PF<sub>6</sub>.**

|      | $g_{\perp}$<br>2.04 | $g_{\parallel}$<br>2.25 |     |
|------|---------------------|-------------------------|-----|
| Cu   | 24                  | 464                     | MHz |
| N(1) | 48                  | 5                       | MHz |
| N(2) | 47                  | 11                      | MHz |
| N(3) | 40                  | 8                       | MHz |

**Table S2. EPR simulation parameters for CuCl<sub>2</sub>(dpa<sup>H</sup>).**

|      | $g_1$<br>2.02 | $g_2$<br>2.12 | $g_3$<br>2.25 |     |
|------|---------------|---------------|---------------|-----|
| Cu   | 51            | 130           | 437           | MHz |
| N(1) | 58            | 54            | 25            | MHz |
| N(2) | 60            | 55            | 35            | MHz |
| N(3) | 59            | 55            | 30            | MHz |

**Table S3. Peak<sup>a</sup> integrations obtained from DPV for CuCl(dpa<sup>OMe</sup>) and CuCl(dpa<sup>H</sup>).**

| CuCl(dpa <sup>OMe</sup> ) |                       |                       | CuCl(dpa <sup>H</sup> ) |                       |                       |
|---------------------------|-----------------------|-----------------------|-------------------------|-----------------------|-----------------------|
|                           | $E_{p1}^{\circ'}$     | $E_{p2}^{\circ'}$     |                         | $E_{p1}^{\circ'}$     | $E_{p2}^{\circ'}$     |
| 1.4 mM                    | $9.17 \times 10^{-7}$ | $9.33 \times 10^{-7}$ | 0.6 mM                  | $6.37 \times 10^{-7}$ | $7.67 \times 10^{-7}$ |
| 2.8 mM                    | $1.62 \times 10^{-6}$ | $1.30 \times 10^{-6}$ | 1.2 mM                  | $1.36 \times 10^{-6}$ | $9.14 \times 10^{-7}$ |
| 7.0 mM                    | $2.87 \times 10^{-5}$ | $1.72 \times 10^{-6}$ | 5.0 mM                  | $2.39 \times 10^{-6}$ | $1.04 \times 10^{-6}$ |

<sup>a</sup> $E_{p1}^{\circ'}$  and  $E_{p2}^{\circ'}$  refer to the oxidative peak potentials measured by DPV.

**Table S4. Parameters obtained from simulated CVs of CuCl(dpa<sup>OMe</sup>) and [CuCl(dpa<sup>OMe</sup>)]<sup>+</sup>.**

|                                              | CuCl(dpa <sup>OMe</sup> ) |                     | [CuCl(dpa <sup>OMe</sup> )] <sup>+</sup> [PF <sub>6</sub> ] <sup>-</sup> |                       |
|----------------------------------------------|---------------------------|---------------------|--------------------------------------------------------------------------|-----------------------|
|                                              | $E_1^{o'}$                | $E_2^{o'}$          | $E_1^{o'}$                                                               | $E_2^{o'}$            |
| V vs Fc <sup>+0</sup> <sup>a</sup>           | -0.56                     | -0.01               | -0.59                                                                    | -0.01                 |
| $K_{eq}$                                     | 125 <sup>b</sup>          | 0.65 <sup>c</sup>   | --                                                                       | 0.007 <sup>c</sup>    |
| $k_s/\text{cm}^{-1}$ <sup>d</sup>            | 0.016                     | 0.006               | 0.011                                                                    | 10                    |
| $k_f/\text{s}^{-1}$ <sup>e</sup>             | 0.01                      | 8 x10 <sup>-5</sup> | --                                                                       | 0.07                  |
| $k_r/\text{s}^{-1}$ <sup>f</sup>             | 0.1                       | 0.15                | --                                                                       | 10                    |
| $\alpha$ <sup>g</sup>                        | 0.5                       | 0.5                 | 0.5                                                                      | 0.5                   |
| $R_u / \Omega$ <sup>h</sup>                  | 100                       | 100                 | 100                                                                      | 100                   |
| $C_{dl} / \mu\text{F}$ <sup>i</sup>          | 1 x10 <sup>-5</sup>       | 1 x10 <sup>-6</sup> | 1 x10 <sup>-5</sup>                                                      | 1 x10 <sup>-5</sup>   |
| $D / \text{cm}^2 \text{s}^{-1}$ <sup>j</sup> | 8 x10 <sup>-6</sup>       | 8 x10 <sup>-6</sup> | 1.1 x10 <sup>-5</sup>                                                    | 1.1 x10 <sup>-5</sup> |

**Table S5. Parameters obtained from simulated CVs of CuCl(dpa<sup>H</sup>) and CuCl<sub>2</sub>(dpa<sup>H</sup>).**

|                                              | CuCl(dpa <sup>H</sup> ) |                       | CuCl <sub>2</sub> (dpa <sup>H</sup> ) |                                    |
|----------------------------------------------|-------------------------|-----------------------|---------------------------------------|------------------------------------|
|                                              | $E_1^{o'}$              | $E_2^{o'}$            | $E_1^{o'}$                            | $E_2^{o'}$                         |
| V vs Fc <sup>+0</sup> <sup>a</sup>           | -0.44                   | -0.04                 | -0.47                                 | -0.06                              |
| $K_{eq}$                                     | 125 <sup>b</sup>        | 0.4 <sup>c</sup>      | 1.5 x10 <sup>-4</sup> <sup>b</sup>    | 9.5 x10 <sup>-4</sup> <sup>c</sup> |
| $k_s/\text{cm}^{-1}$ <sup>d</sup>            | 0.015                   | 0.004                 | 0.017                                 | 0.005                              |
| $k_f/\text{s}^{-1}$ <sup>e</sup>             | 0.01                    | 8 x10 <sup>-5</sup>   | 0.08                                  | 533                                |
| $k_r/\text{s}^{-1}$ <sup>f</sup>             | 0.1                     | 0.26                  | 0.017                                 | 17.8                               |
| $\alpha$ <sup>g</sup>                        | 0.5                     | 0.5                   | 0.5                                   | 0.5                                |
| $R_u / \Omega$ <sup>h</sup>                  | 100                     | 100                   | 100                                   | 100                                |
| $C_{dl} / \mu\text{F}$ <sup>i</sup>          | 1 x10 <sup>-5</sup>     | 1 x10 <sup>-5</sup>   | 1 x10 <sup>-5</sup>                   | 1 x10 <sup>-5</sup>                |
| $D / \text{cm}^2 \text{s}^{-1}$ <sup>j</sup> | 8.5 x10 <sup>-6</sup>   | 8.5 x10 <sup>-6</sup> | 1.5 x10 <sup>-5</sup>                 | 1.5 x10 <sup>-5</sup>              |

<sup>a</sup>Redox potential. <sup>b</sup>Equilibrium constant for the dynamic process in the copper (II) state. <sup>c</sup>Equilibrium constant for the dynamic process in the copper (I) state. <sup>d</sup>Rate constant for the electron transfer. <sup>e</sup>Rate constant for the dynamic process in the copper (II) state. <sup>f</sup>Rate constant for the dynamic process in the copper (I) state. <sup>g</sup>Electron transfer coefficient. <sup>h</sup>Resistance. <sup>i</sup>Capacitance. <sup>j</sup>Diffusion coefficient for all species.

**Table S6. XRD collection and refinement parameters for  $[\{\text{Cu}(\text{dpa}^{\text{OMe}})\}_2(\mu\text{-Cl})][\text{CuCl}_2]$  and  $[\text{CuCl}(\text{dpa}^{\text{OMe}})][\text{PF}_6]$ .**

|                                   | $[\{\text{Cu}(\text{dpa}^{\text{OMe}})\}_2(\mu\text{-Cl})][\text{CuCl}_2]$ | $[\text{CuCl}(\text{dpa}^{\text{OMe}})][\text{PF}_6] \cdot 2\text{CH}_2\text{Cl}_2$ |
|-----------------------------------|----------------------------------------------------------------------------|-------------------------------------------------------------------------------------|
| empirical formula                 | $\text{C}_{38}\text{H}_{38}\text{Cl}_3\text{Cu}_3\text{N}_6\text{O}_2$     | $\text{C}_{21}\text{H}_{23}\text{Cl}_5\text{CuF}_6\text{N}_3\text{OP}$              |
| formula weight                    | 907.71                                                                     | 719.18                                                                              |
| crystal system                    | orthorhombic                                                               | triclinic                                                                           |
| space group                       | $P2_12_12_1$                                                               | $P\bar{1}$                                                                          |
| T(K)                              | 130.0                                                                      | 100.0                                                                               |
| $a / \text{Å}$                    | 8.2127(2)                                                                  | 10.4034(6)                                                                          |
| $b / \text{Å}$                    | 19.9564(5)                                                                 | 11.1847(7)                                                                          |
| $c / \text{Å}$                    | 23.1694(6)                                                                 | 13.3875(7)                                                                          |
| $\alpha / \text{deg}$             | 90                                                                         | 72.920(2)                                                                           |
| $\beta / \text{deg}$              | 90                                                                         | 69.922(2)                                                                           |
| $\gamma / \text{deg}$             | 90                                                                         | 78.631(2)                                                                           |
| $V / \text{Å}^3$                  | 3797.37(17)                                                                | 1390.49(14)                                                                         |
| $Z$                               | 4                                                                          | 2                                                                                   |
| refl. collected                   | 28242                                                                      | 50210                                                                               |
| indep. refl.                      | 7769 [R(int) = 0.0453]                                                     | 5716 [R(int) = 0.0399]                                                              |
| R1 ( $I > 2\sigma$ ) <sup>a</sup> | 0.0295(0.0356)                                                             | 0.0472 (0.0550)                                                                     |
| wR2 (all data) <sup>b</sup>       | 0.0570(0.0596)                                                             | 0.1249 (0.1336)                                                                     |
| GOF                               | 1.054                                                                      | 1.055                                                                               |

<sup>a</sup>R1 =  $\sum||F_o| - |F_c|| / \sum|F_o|$ ; <sup>b</sup>wR2 =  $[\sum[w(F_o^2 - F_c^2)^2] / \sum[w(F_o^2)^2]]^{1/2}$

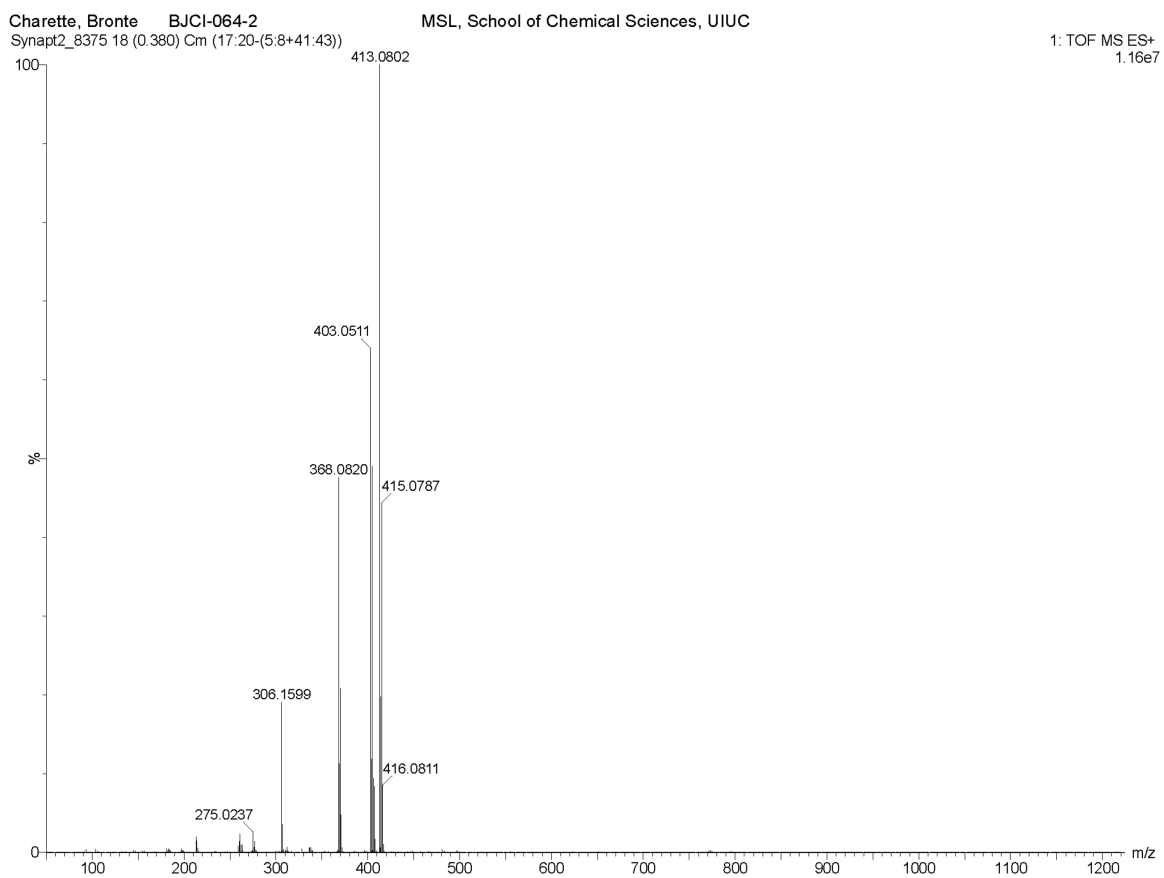

**Figure S1.** Mass spectrum of  $\text{CuCl}(\text{dpa}^{\text{OMe}})$  in DCM.

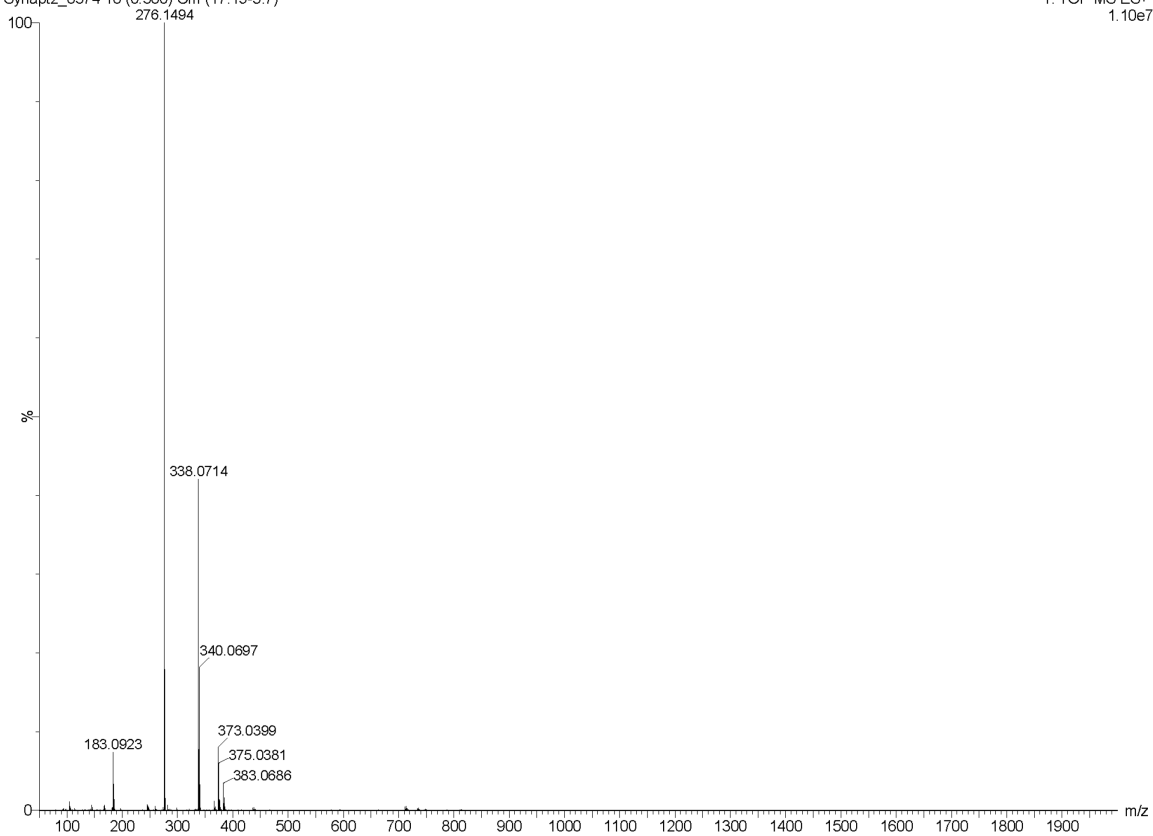

**Figure S2.** Mass spectrum of  $\text{CuCl}(\text{dpa}^{\text{H}})$  in DCM.

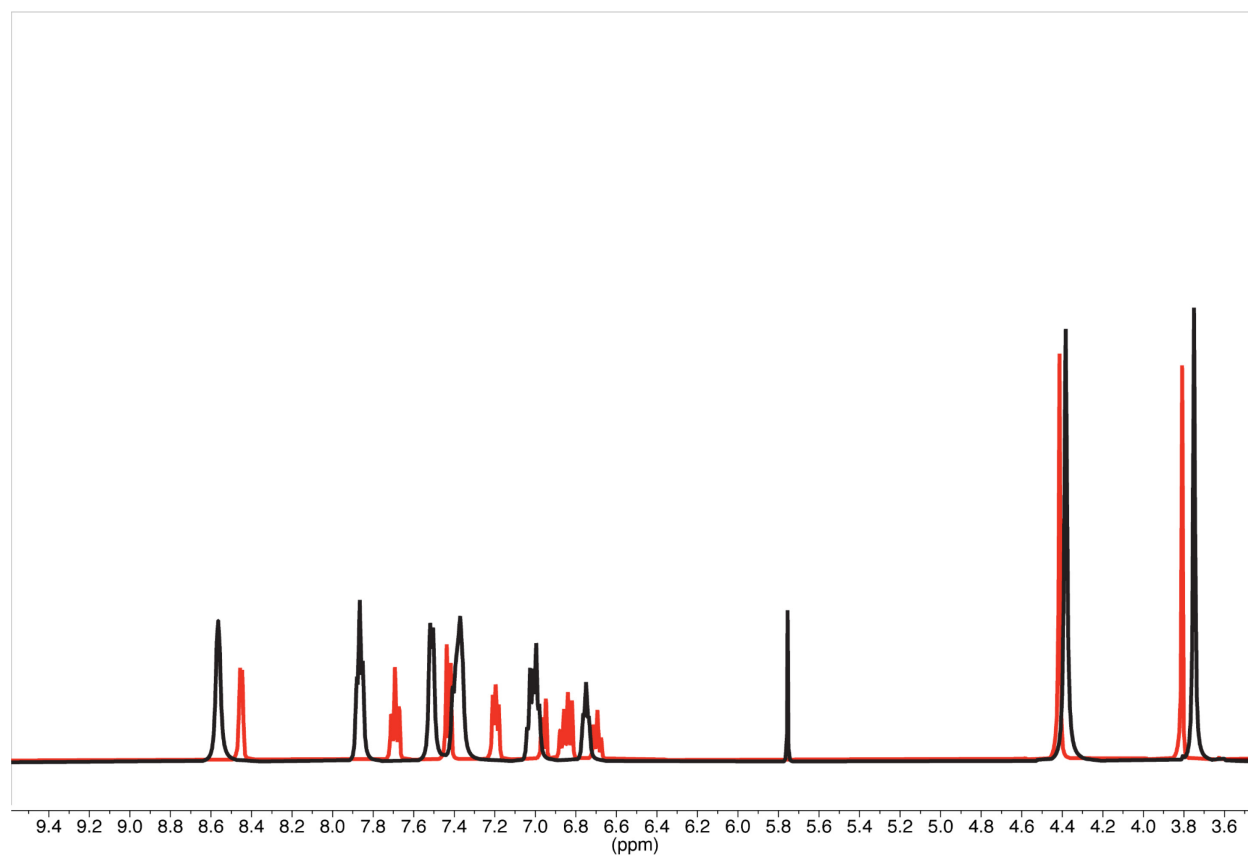

**Figure S3.** Overlaid <sup>1</sup>H-NMR spectrum of CuCl(dpa<sup>OMe</sup>) (black) and dpa<sup>OMe</sup> ligand (red) in *d*<sub>6</sub>-DMSO at 298 K.



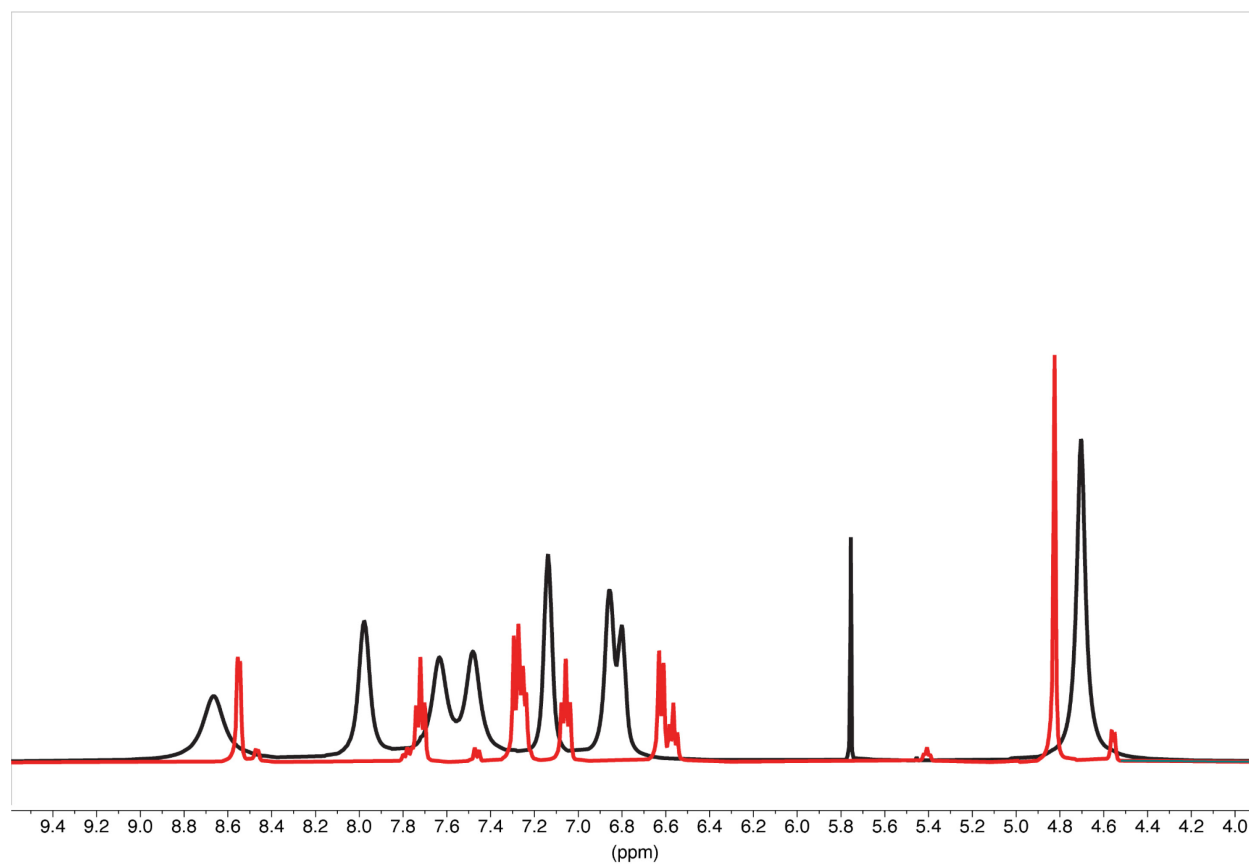

**Figure S4.** Overlaid <sup>1</sup>H-NMR spectrum of CuCl(dpa<sup>H</sup>) (black) and dpa<sup>H</sup> ligand (red) in *d*<sub>6</sub>-DMSO at 298 K.

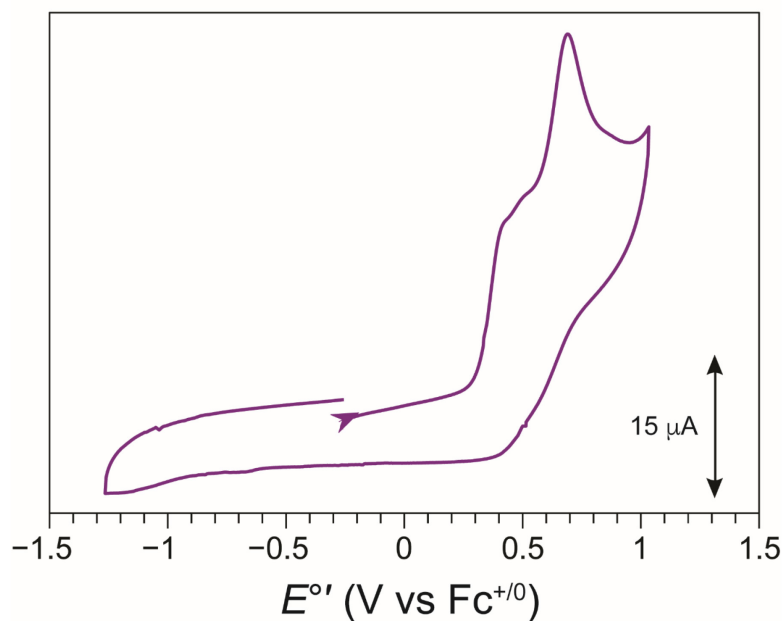

**Figure S5.** CV recorded with 1 mM ligand  $\text{dpa}^{\text{OMe}}$  concentration with 100 mM  $[\text{NBu}_4][\text{PF}_6]$  electrolyte in dry degassed DMF under a nitrogen atmosphere using a 3 mm glassy carbon working electrode, Pt wire counter electrode and  $\text{Ag}^{+/0}$  pseudo-reference electrode at room temperature with  $100 \text{ mVs}^{-1}$  scan rate.

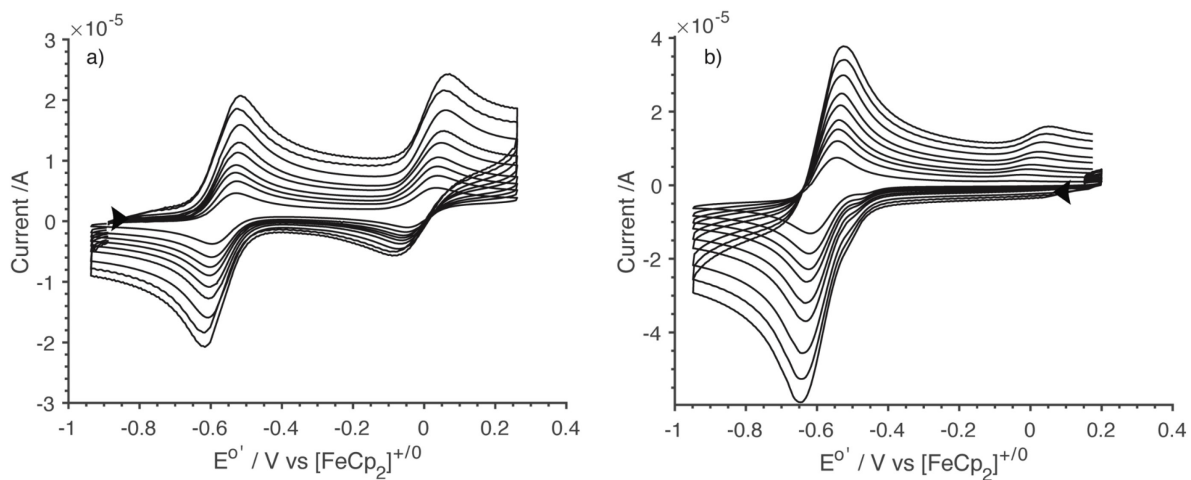

**Figure S6.** CV scan rate dependencies of a)  $\text{CuCl}(\text{dpa}^{\text{OMe}})$  and b)  $[\text{CuCl}(\text{dpa}^{\text{OMe}})][\text{PF}_6]$  at 25, 50, 75, 100, 150, 200, 300, 400 and 500  $\text{mV sec}^{-1}$  scan rates. Cyclic voltammograms were recorded with 1 mM analyte and 100 mM  $[\text{NBu}_4][\text{PF}_6]$  electrolyte in dry degassed DMF under a nitrogen atmosphere using a 3 mm glassy carbon working electrode, Pt wire counter electrode and  $\text{Ag}^{+/0}$  pseudo-reference electrode at ambient temperature.

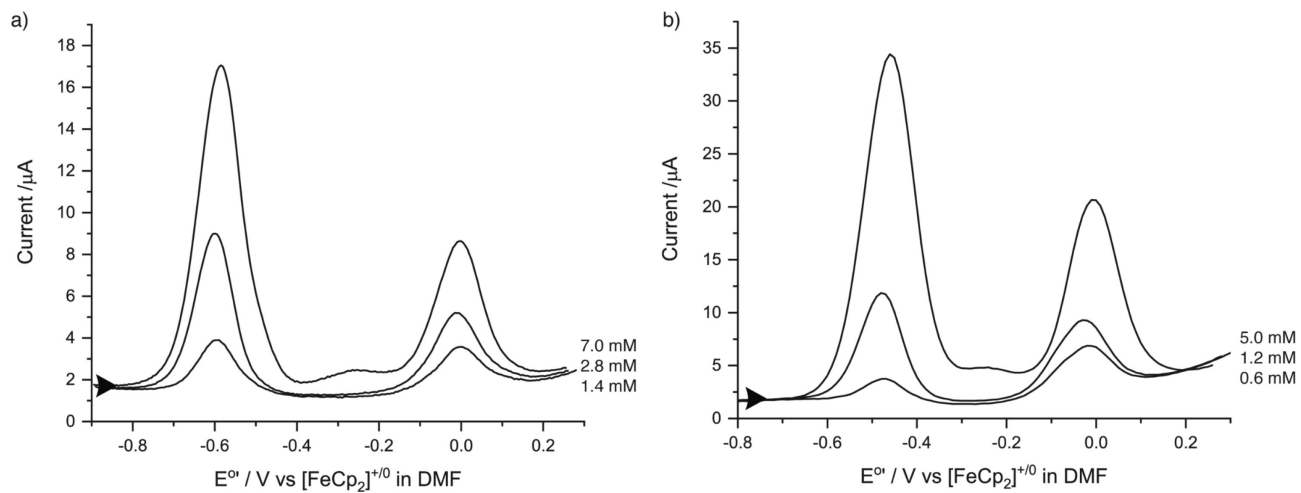

**Figure S7.** Differential pulse voltammograms for a)  $\text{CuCl}(\text{dpa}^{\text{OMe}})$  at 1.4 mM, 2.8 mM and 7.0 mM concentrations and b)  $\text{CuCl}(\text{dpa}^{\text{H}})$  at 0.6 mM, 1.2 mM and 5 mM in DMF at ambient temperatures. Data were collected using the same solution conditions to cyclic voltammograms.

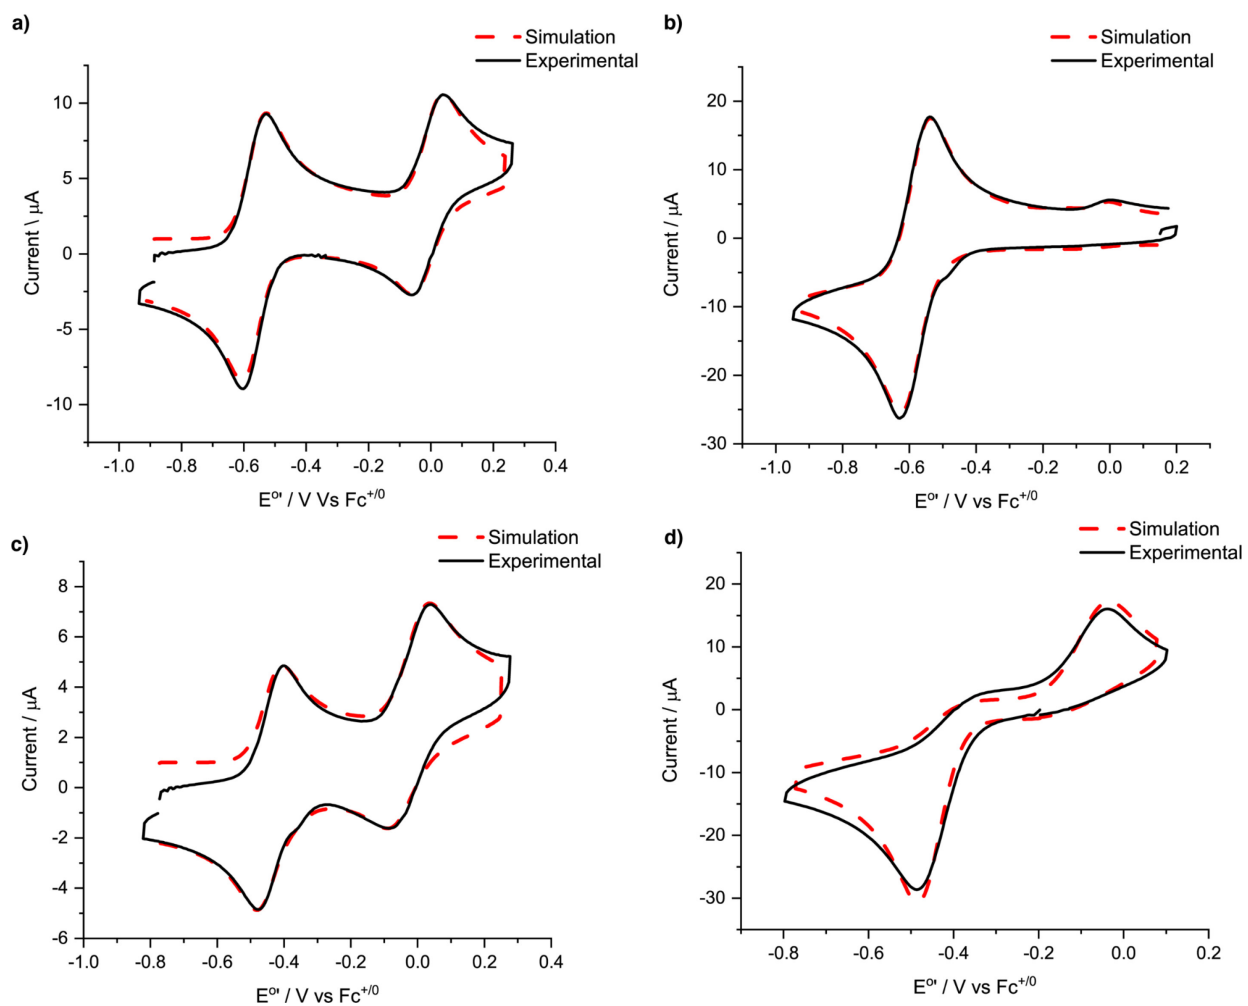

**Figure S8.** CV simulations on 1 mM solutions of a)  $\text{CuCl}(\text{dpa}^{\text{OMe}})$ , b)  $[\text{CuCl}(\text{dpa}^{\text{OMe}})][\text{PF}_6]$ , c)  $\text{CuCl}(\text{dpa}^{\text{H}})$  and d)  $\text{CuCl}_2(\text{dpa}^{\text{H}})$  performed using BASi DigiElch 8.0 with simulated spectra in red dashed lines and experimental spectra in black solid lines.

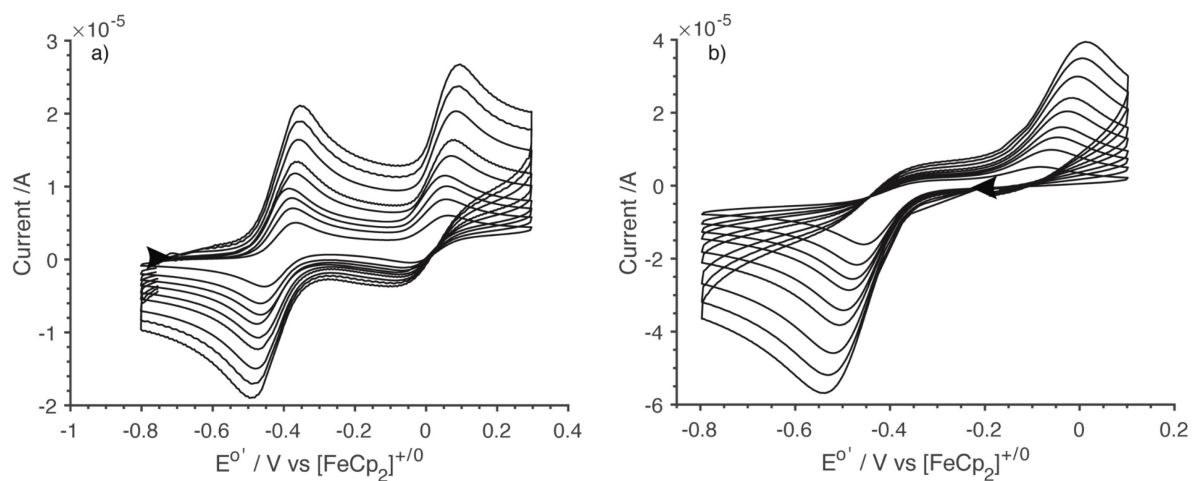

**Figure S9.** CV scan rate dependencies of a)  $\text{CuCl}(\text{dpa}^{\text{H}})$  and b)  $\text{CuCl}_2(\text{dpa}^{\text{H}})$  at 25, 50, 75, 100, 150, 200, 300, 400 and 500  $\text{mV sec}^{-1}$  scan rates. Cyclic voltammetry were recorded with 1 mM analyte concentration with 100 mM  $[\text{NBu}_4][\text{PF}_6]$  electrolyte in dry degassed DMF under a nitrogen atmosphere using a 3 mm glassy carbon working electrode, Pt wire counter electrode and  $\text{Ag}^{+/0}$  pseudo-reference electrode at ambient temperature.

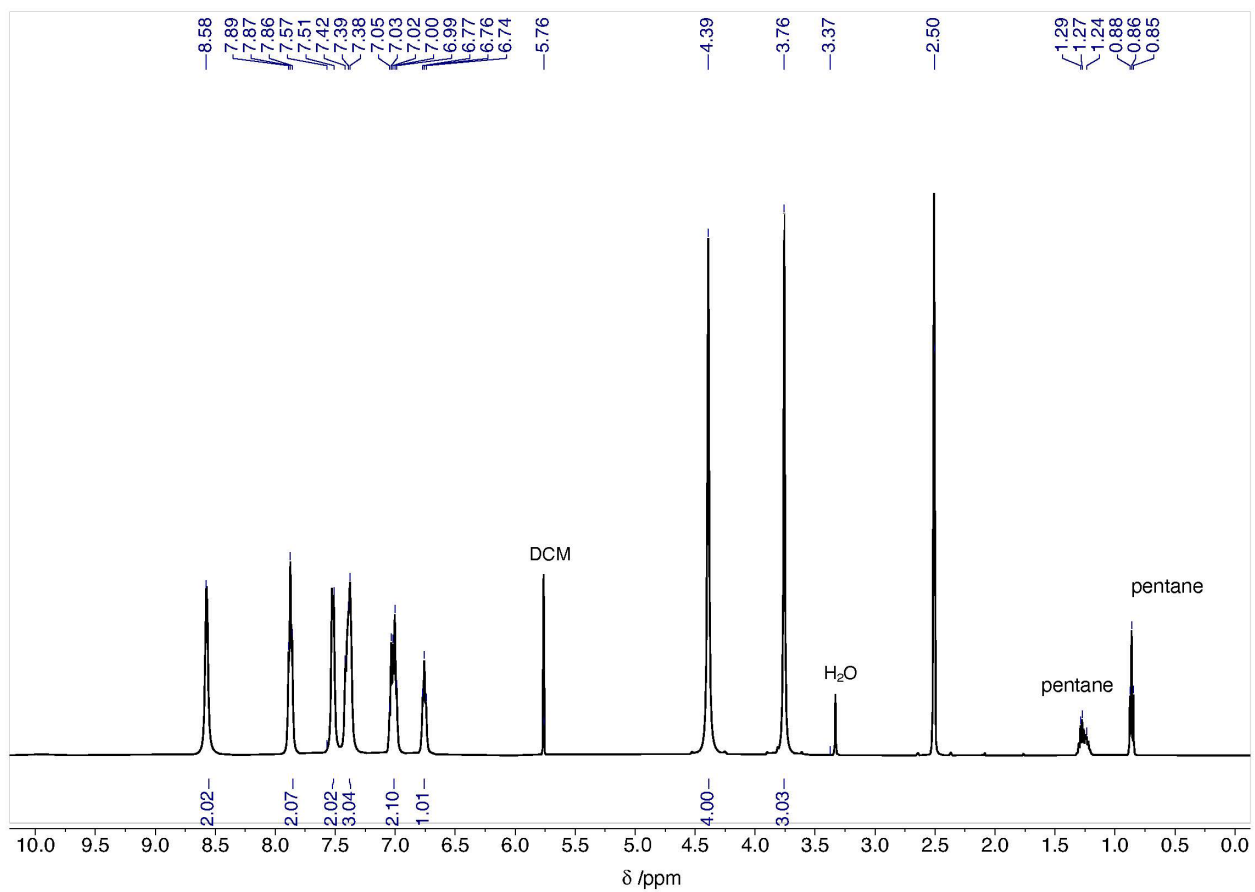

**Figure S10.**  $^1\text{H-NMR}$  spectrum of  $\text{CuCl}(\text{dpa}^{\text{OMe}})$  in  $d_6\text{-DMSO}$  at 298 K.

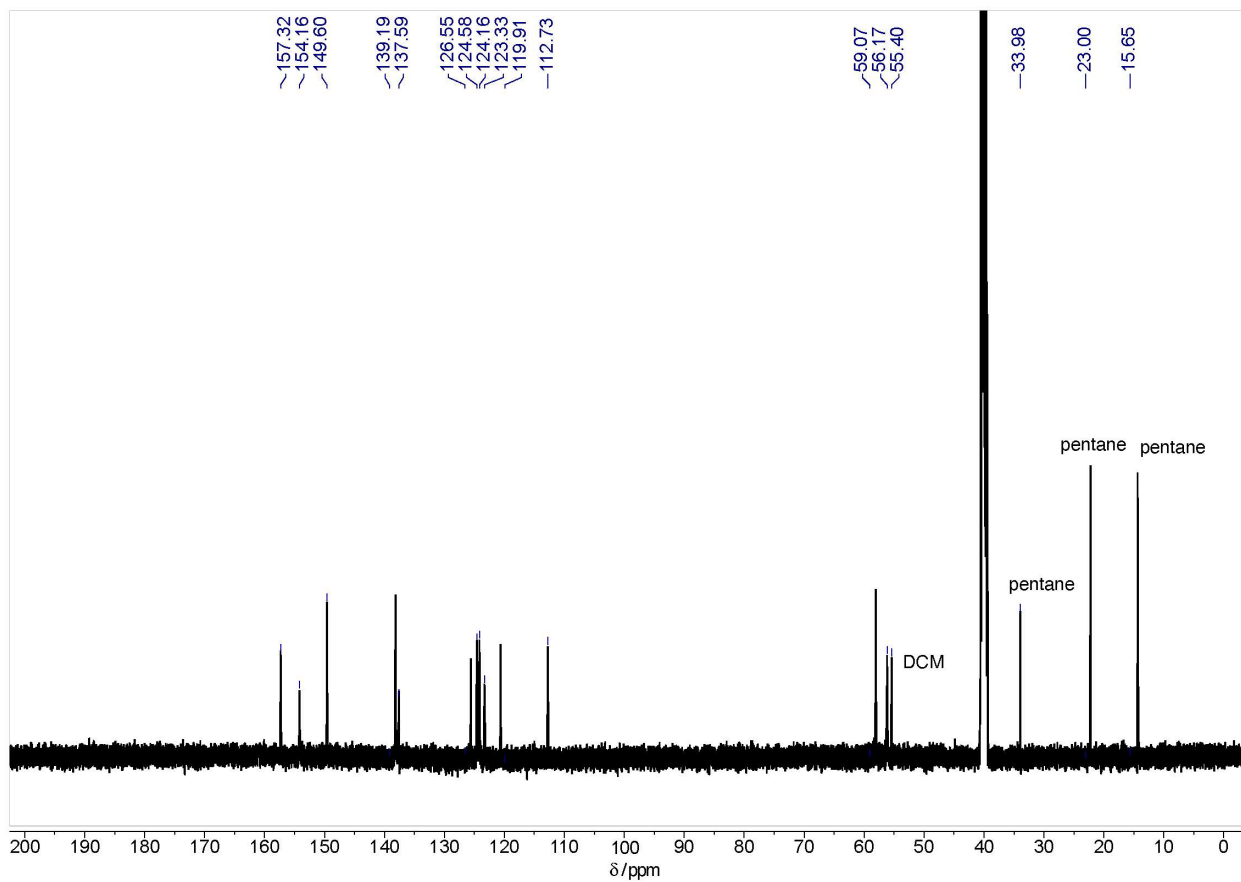

**Figure S11.**  $^{13}\text{C}$ -NMR spectrum of  $\text{CuCl}(\text{dpa}^{\text{OMe}})$  in  $d_6$ -DMSO at 298 K.



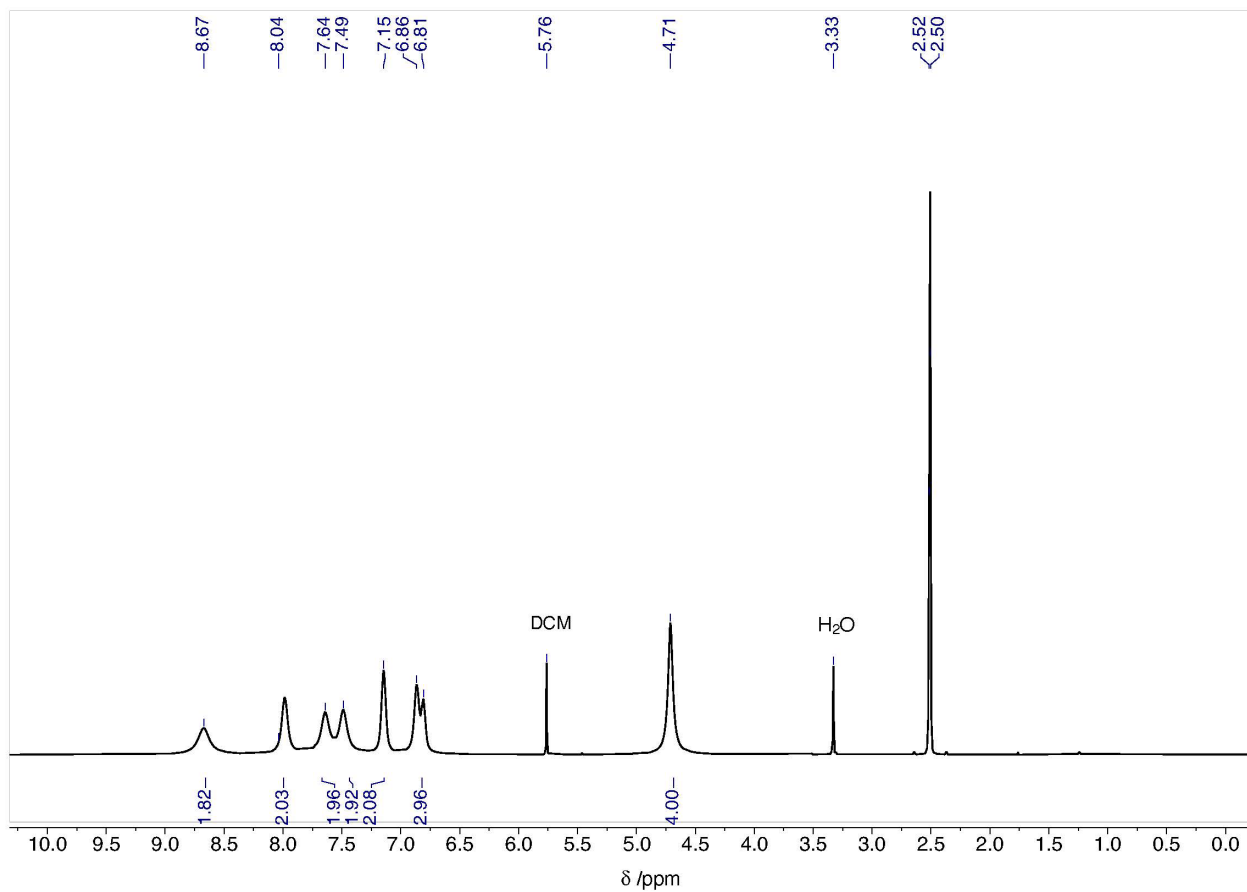

**Figure S12.**  $^1\text{H}$ -NMR spectrum of  $\text{CuCl}(\text{dpa}^{\text{H}})$  in  $d_6$ -DMSO at 298 K.

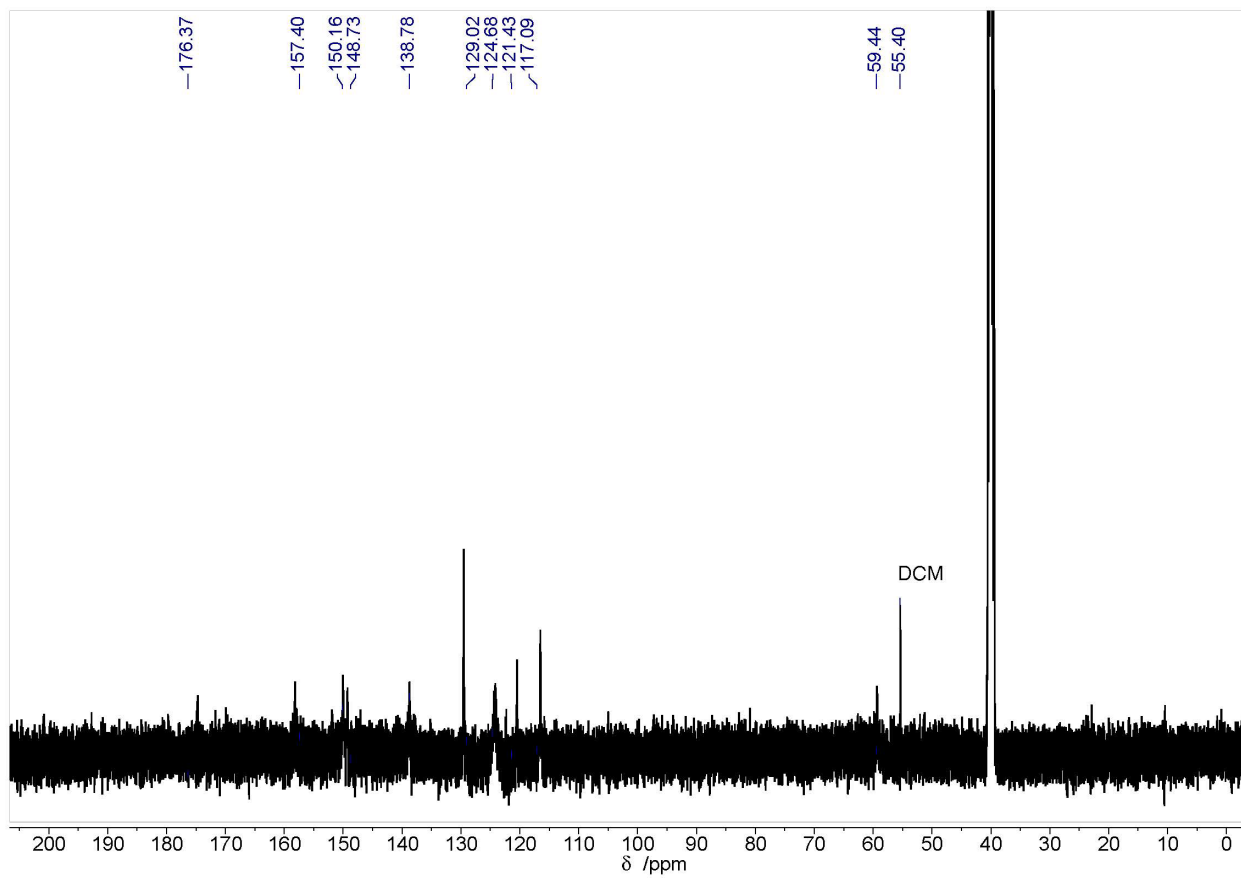

**Figure S13.**  $^{13}\text{C}$ -NMR spectrum of  $\text{CuCl}(\text{dpa}^{\text{H}})$  in  $d_6$ -DMSO at 298 K.

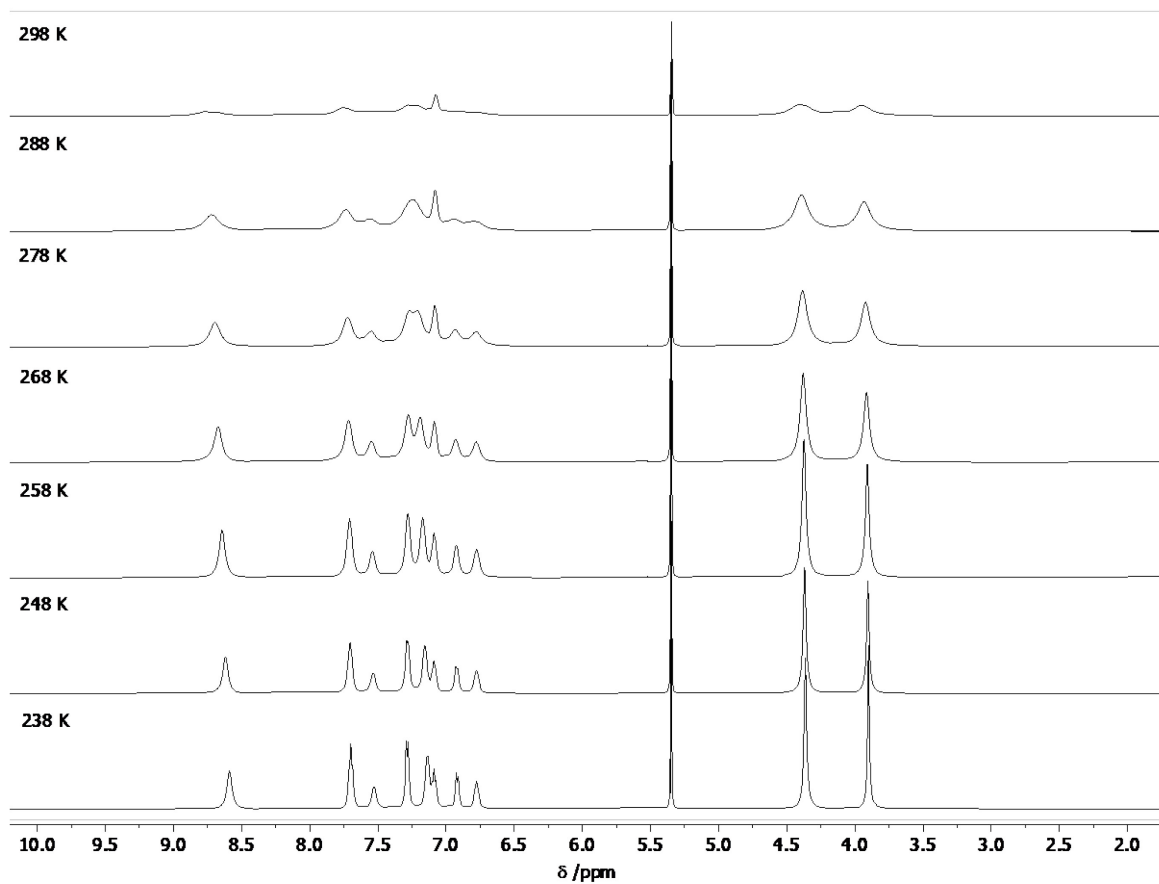

**Figure S14.** <sup>1</sup>H-NMR spectra (500 MHz) of CuCl(dpa<sup>OMe</sup>) in *d*<sub>2</sub>-DCM over the temperature range of 238-298 K.

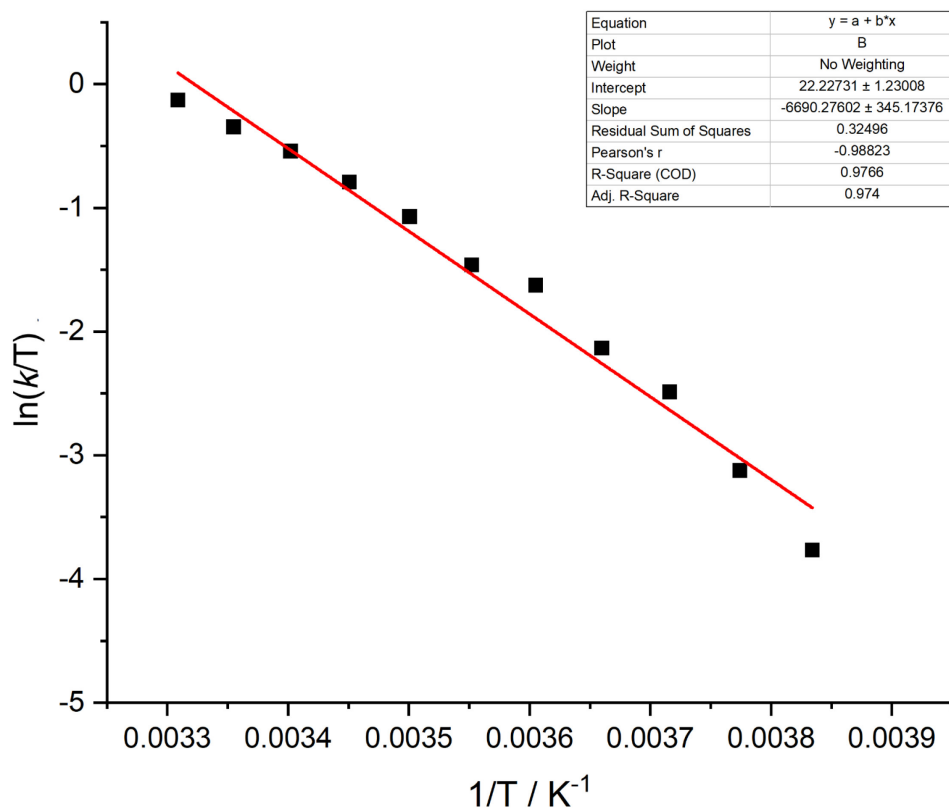

**Figure S15.** Plot of  $\ln(k/T)$  versus  $1/T$  (where  $k$  = rate constant and  $T$  = temperature in K) for the dynamic NMR process of  $\text{CuCl}(\text{dpa}^{\text{OMe}})$  in  $\text{d}_2\text{-DCM}$  from 238-298 K. The shown linear fit was used to calculate the activation parameters listed in the main text via the Eyring equation ( $R^2 = 0.9766$ ).

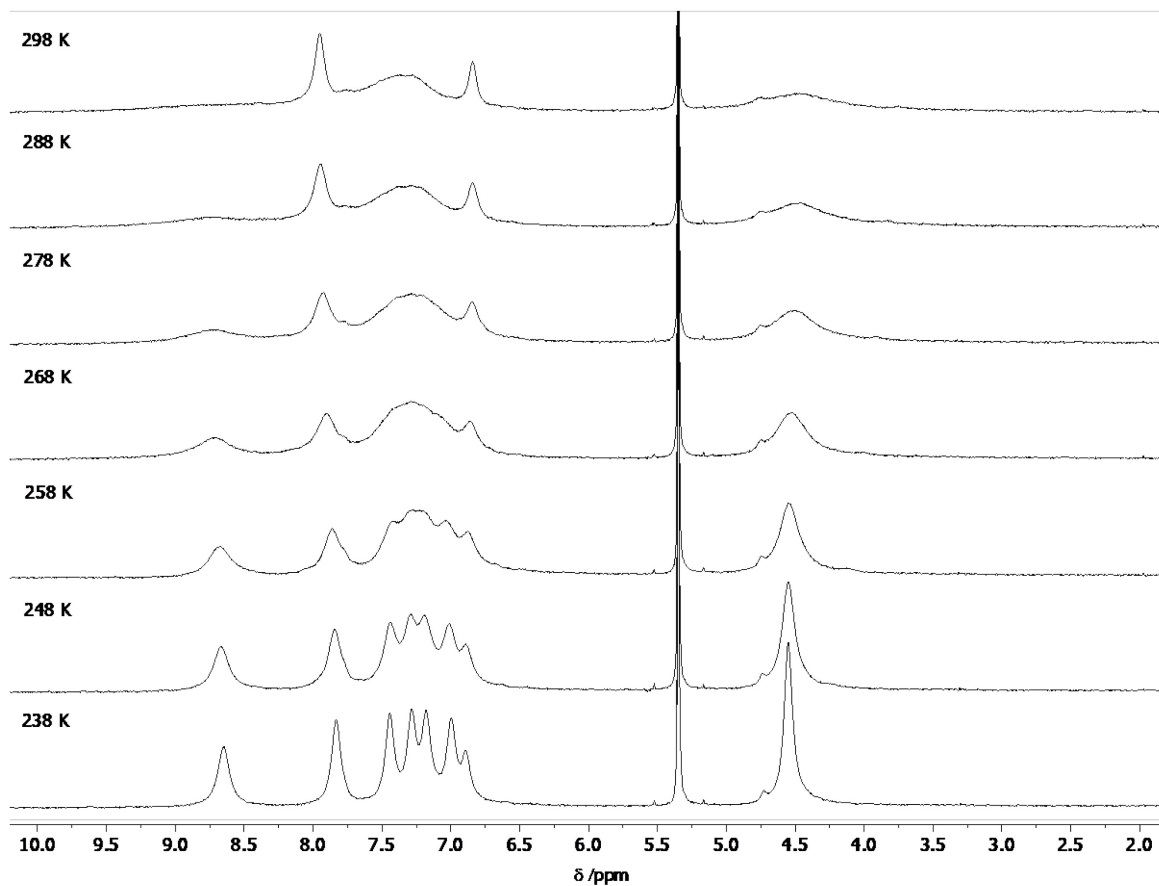

**Figure S16.** <sup>1</sup>H-NMR spectra (500 MHz) of CuCl(dpa<sup>H</sup>) in *d*<sub>2</sub>-DCM over the temperature range of 238–298 K.

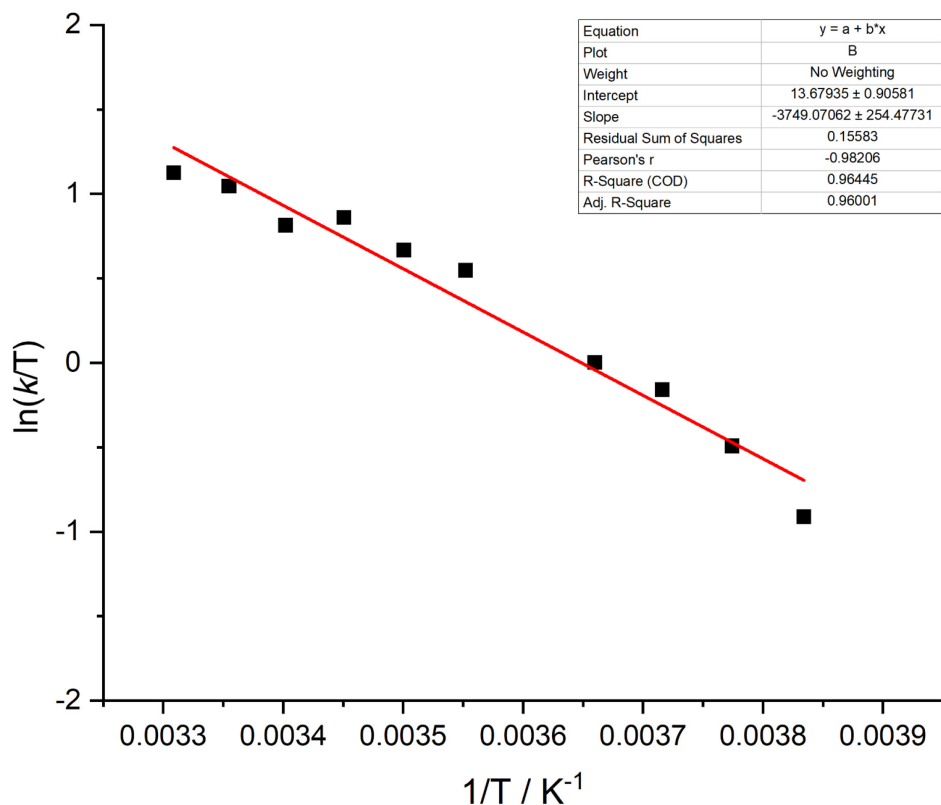

**Figure S17.** Plot of  $\ln(k/T)$  versus  $1/T$  (where  $k$  = rate constant and  $T$  = temperature in K) for the dynamic NMR process of  $\text{CuCl}(\text{dpa}^{\text{H}})$  in  $d_2$ -DCM from 238–298 K. The shown linear fit was used to calculate the activation parameters listed in the main text via the Eyring equation ( $R^2 = 0.96445$ ).

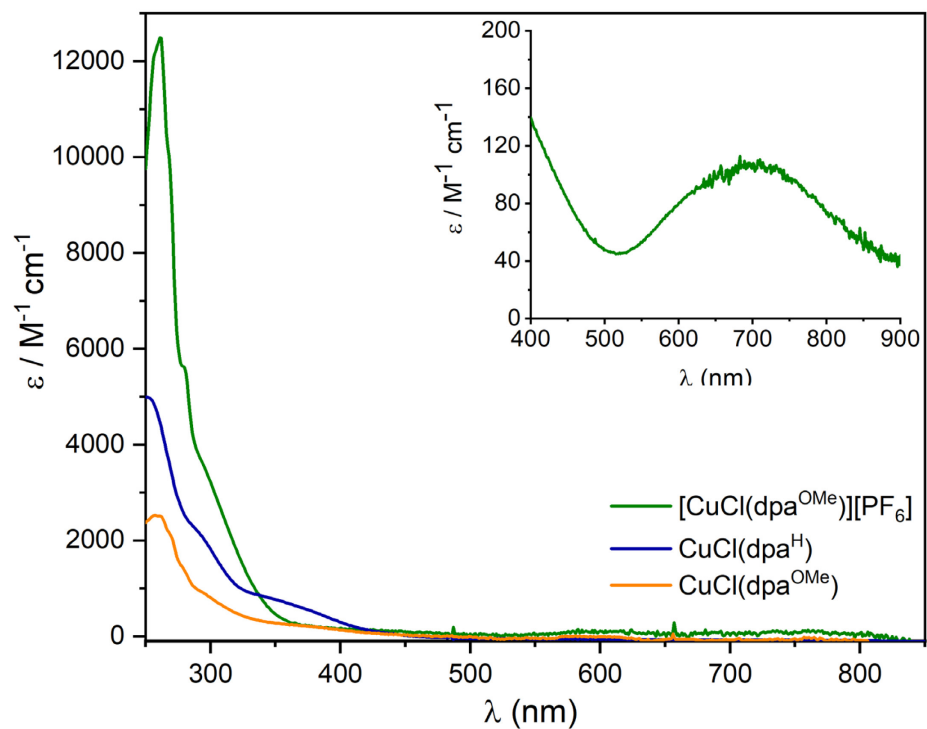

**Figure S18.** Extinction coefficient plots for  $[\text{CuCl}(\text{dpa}^{\text{OMe}})][\text{PF}_6]$  (green),  $\text{CuCl}(\text{dpa}^{\text{H}})$  (blue) and  $\text{CuCl}(\text{dpa}^{\text{OMe}})$  (orange) in DCM. Inset: Zoomed in region of  $[\text{CuCl}(\text{dpa}^{\text{OMe}})][\text{PF}_6]$  spectra from 400–900 nm.

## References

1. J. Sandstrom, *Dynamic NMR Spectroscopy*, Academic Press, London, 1982.
2. M. Hasani, L. Nordstierna and A. Martinelli, *Phys. Chem. Chem. Phys.*, 2019, **21**, 22014–22021.
3. M. R. Willcott, *J. Am. Chem. Soc.*, 2009, **131**, 13180–13180.
